# Supplementary material for: High thermal stability phosphors with a rigid structure similar to the benzene ring and application in plant growth
Source: Royal Society of Chemistry journal article supplement (doi:10.1039/d2tc03804h), 2022-01-01
Supplement: d2tc03804h1.pdf [file d2tc03804h1.pdf]

## Supporting Information

# High thermal stability phosphor with rigid structure similar to benzene ring and application in plant growth

*Xibao Zhang<sup>a,b</sup>, Langping Dong<sup>d</sup>, Liang Zhang<sup>a,b</sup>, Yonghui Xu<sup>a,b</sup>, Xiudi Wu<sup>a,b</sup>, Shuwen Yin<sup>a</sup>, Chuansheng*

*Zhong<sup>a,b</sup> and Hongpeng You<sup>a,b,c</sup>\**

<sup>a</sup> State Key Laboratory of Rare Earth Resource Utilization, Changchun Institute of Applied Chemistry,

Chinese Academy of Sciences, Changchun 130022, P. R. China

<sup>b</sup> University of Science and Technology of China, Hefei 230026, P. R. China

<sup>c</sup> Ganjiang Innovation Academy, Chinese Academy of Sciences, Ganzhou 341000, China

<sup>d</sup> School of Materials Science and Engineering, Shanghai Institute of Technology, Shanghai, 201418, China.

\*Corresponding author. Fax: +86 431 85698041. E-mail address: [hpyou@ciac.ac.cn](mailto:hpyou@ciac.ac.cn) (H.P. You).

**Table S1.** Results of structure refinement and main parameters of the  $\text{LiAl}_x\text{Ga}_{1-x}\text{GeO}_4:0.002\text{Cr}^{3+}$  samples.

| x     | Space group | Cell parameters(Å)  | Volume(Å <sup>3</sup> ) | R <sub>wp</sub> , R <sub>p</sub> (%) |
|-------|-------------|---------------------|-------------------------|--------------------------------------|
| x=0   | R-3 H       | a=13.9338, c=9.2992 | 1563.572                | 8.51, 6.59                           |
| x=0.1 | R-3 H       | a=13.9225, c=9.2920 | 1559.804                | 6.99, 5.56                           |
| x=0.5 | R 3 H       | a=13.8745, c=9.2617 | 1546.821                | 8.11, 6.23                           |
| x=0.7 | R 3 H       | a=13.8598, c=9.2516 | 1539.075                | 5.59, 4.29                           |
| x=0.9 | R-3 H       | a=13.7866, c=9.2036 | 1514.962                | 6.52, 4.74                           |

**Table S2.** The parameters of  $D_q$ ,  $B$  and  $D_q/B$  of the  $\text{LiAl}_x\text{Ga}_{1-x}\text{GeO}_4:0.002\text{Cr}^{3+}$  samples.

| Host                                           | $D_q(\text{cm}^{-1})$ | $B(\text{cm}^{-1})$ | $D_q/B$ |
|------------------------------------------------|-----------------------|---------------------|---------|
| $\text{LiGaGeO}_4$                             | 1715                  | 738                 | 2.32    |
| $\text{LiGa}_{0.9}\text{Al}_{0.1}\text{GeO}_4$ | 1709                  | 730                 | 2.34    |
| $\text{LiGa}_{0.5}\text{Al}_{0.5}\text{GeO}_4$ | 1703                  | 714                 | 2.38    |
| $\text{LiGa}_{0.3}\text{Al}_{0.7}\text{GeO}_4$ | 1692                  | 701                 | 2.41    |

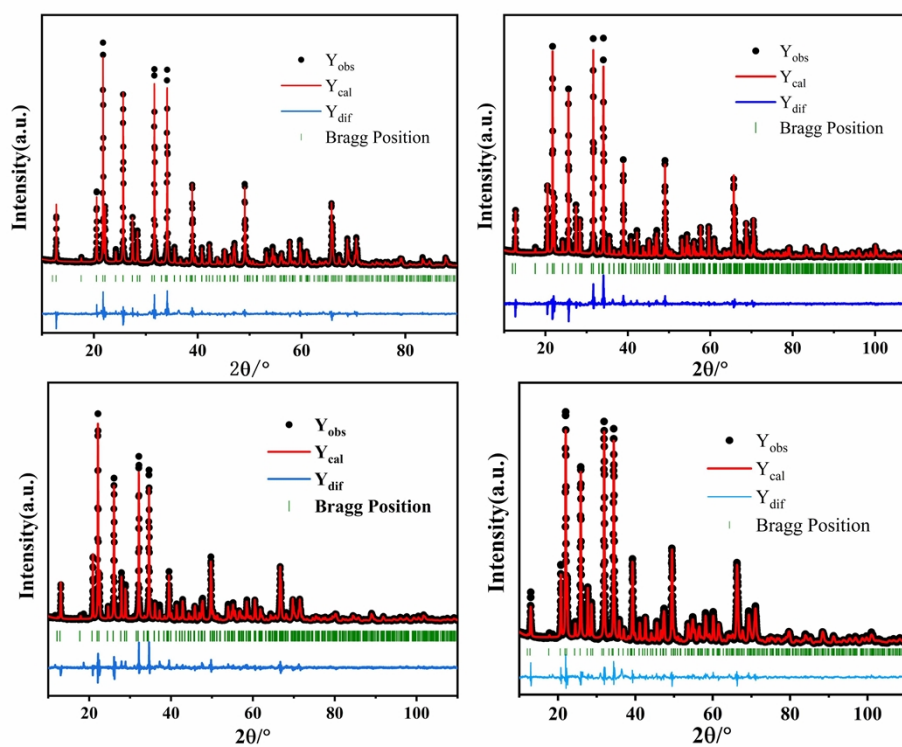

**Figure S1.** (a) Rietveld structure refinement results of  $\text{LiAl}_x\text{Ga}_{1-x}\text{GeO}_4:0.002\text{Cr}^{3+}$  samples.

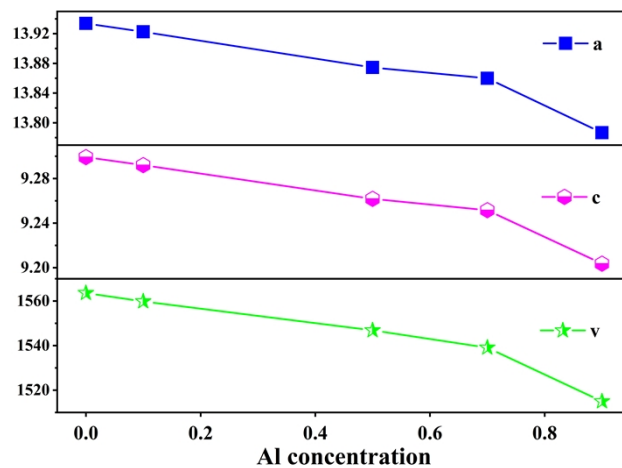

**Figure S2.** Relationship between Al<sup>3+</sup> doping concentration and cell parameters.

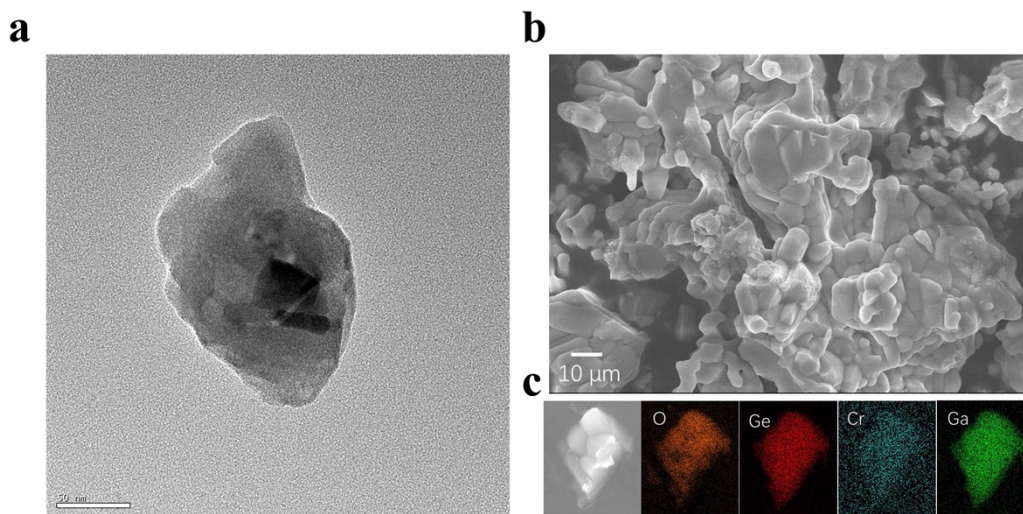

**Figure S3.** (a) TEM image of LiGaGeO<sub>4</sub>:0.002Cr<sup>3+</sup>. (b) SEM result of LiGaGeO<sub>4</sub>:0.002Cr<sup>3+</sup>. (c) EDS mapping result of LiGaGeO<sub>4</sub>:0.002Cr<sup>3+</sup>.

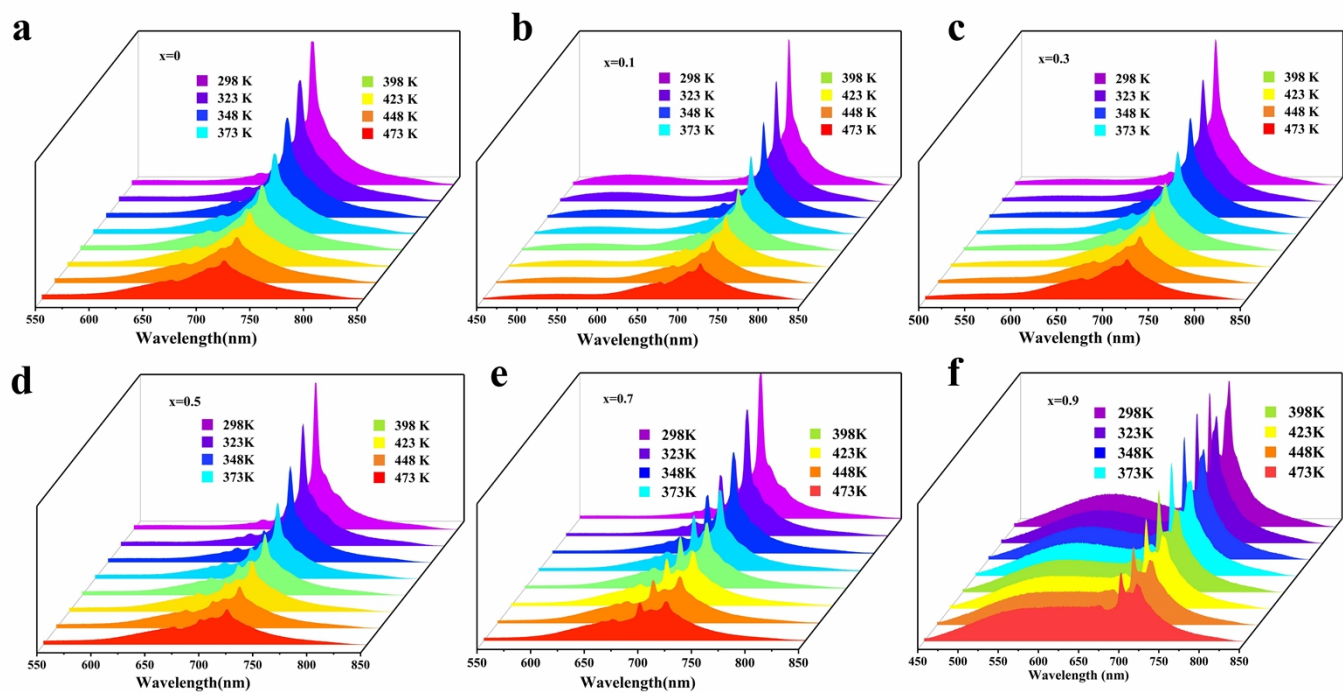

**Figure S4.** (a) Temperature-dependent PL spectra of  $\text{LiGaGeO}_4:0.002\text{Cr}^{3+}$  and  $\text{LiAl}_x\text{Ga}_{1-x}\text{GeO}_4:0.002\text{Cr}^{3+}$ .

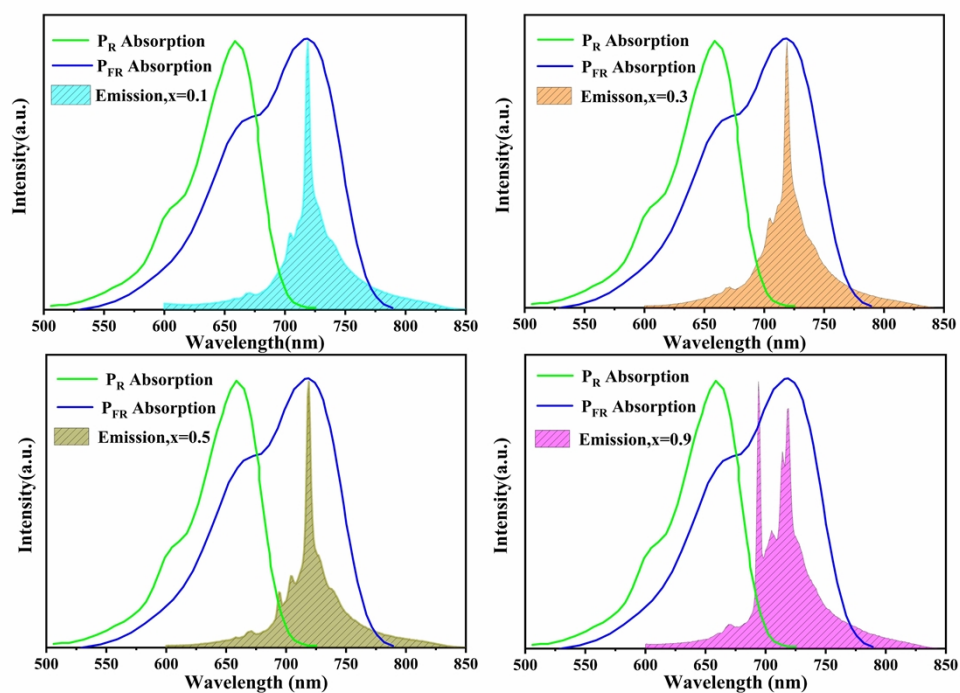

**Figure S5.** The absorption spectra of phytochrome and emission spectra of as-synthesized phosphors  $\text{LiAl}_x\text{Ga}_{1-x}\text{GeO}_4:0.002\text{Cr}^{3+}$ .

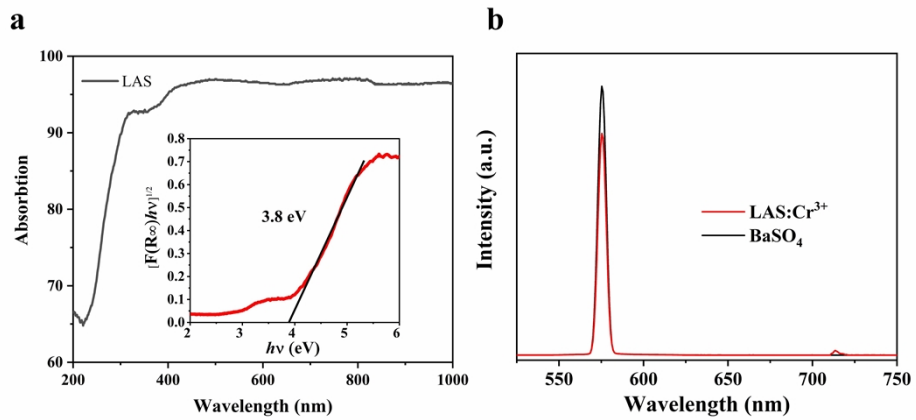

**Figure S5.** (a) The date of diffuse reflection spectra and band gap calculation. (b) Quantum efficiency of as-synthesized phosphors  $\text{LiAlSiO}_4:0.002\text{Cr}^{3+}$ .
